# Supplementary material for: Transmission/absorption measurements for in situ monitoring of transparent conducting Ga:ZnO films grown via aqueous methods
Source: Royal Society of Chemistry journal article supplement (doi:10.1039/c3ta12461d), 2013-01-01
Supplement: c3ta12461d.pdf [file c3ta12461d.pdf]

## Electronic Supplementary Information (ESI)

### An in-situ study of nucleation and growth of aqueous phase deposited Ga:ZnO transparent conducting films using optical techniques

Moe Kevin and Ghim Wei Ho\*

*Department of Electrical and Computer Engineering,  
National University of Singapore,  
4 Engineering Drive 3, 117576, Singapore.  
E-mail: elehgw@nus.edu.sg*

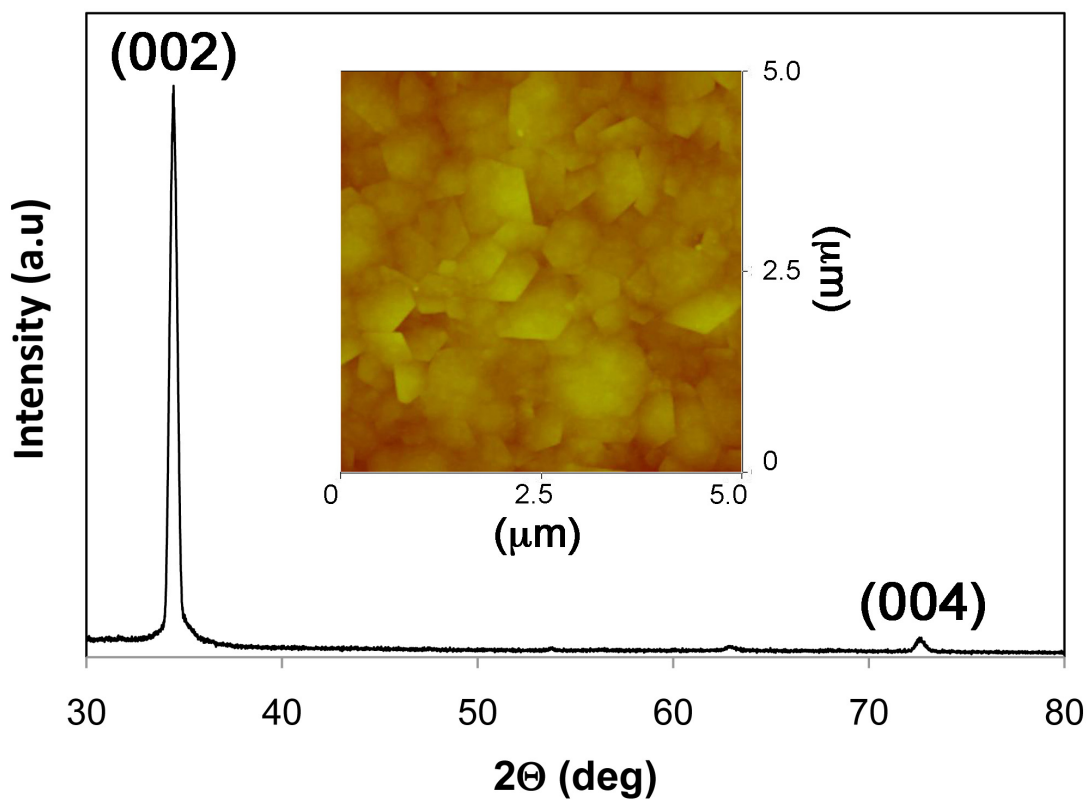

Fig. S1

XRD of Ga:ZnO film grown with 1.92mM  $\text{Ga}(\text{NO}_3)_3$  and 1.86mM trisodium citrate. Inset: AFM scan across a 5x5 $\mu\text{m}$  region. Films had a RMS roughness of 12nm.

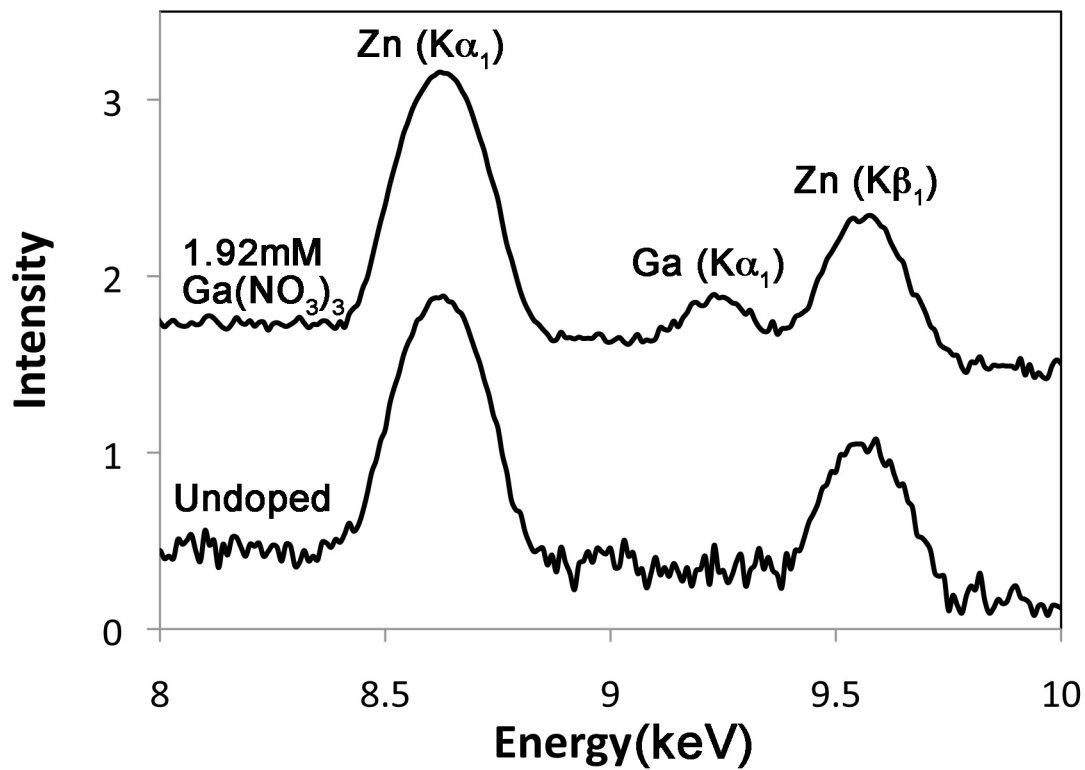

Fig. S2 – EDX spectra of undoped films and films doped with 1.92mM of Ga(NO<sub>3</sub>)<sub>3</sub>. Doped samples had an additional Ga (Kα<sub>1</sub>) peak centered at 9.251keV.

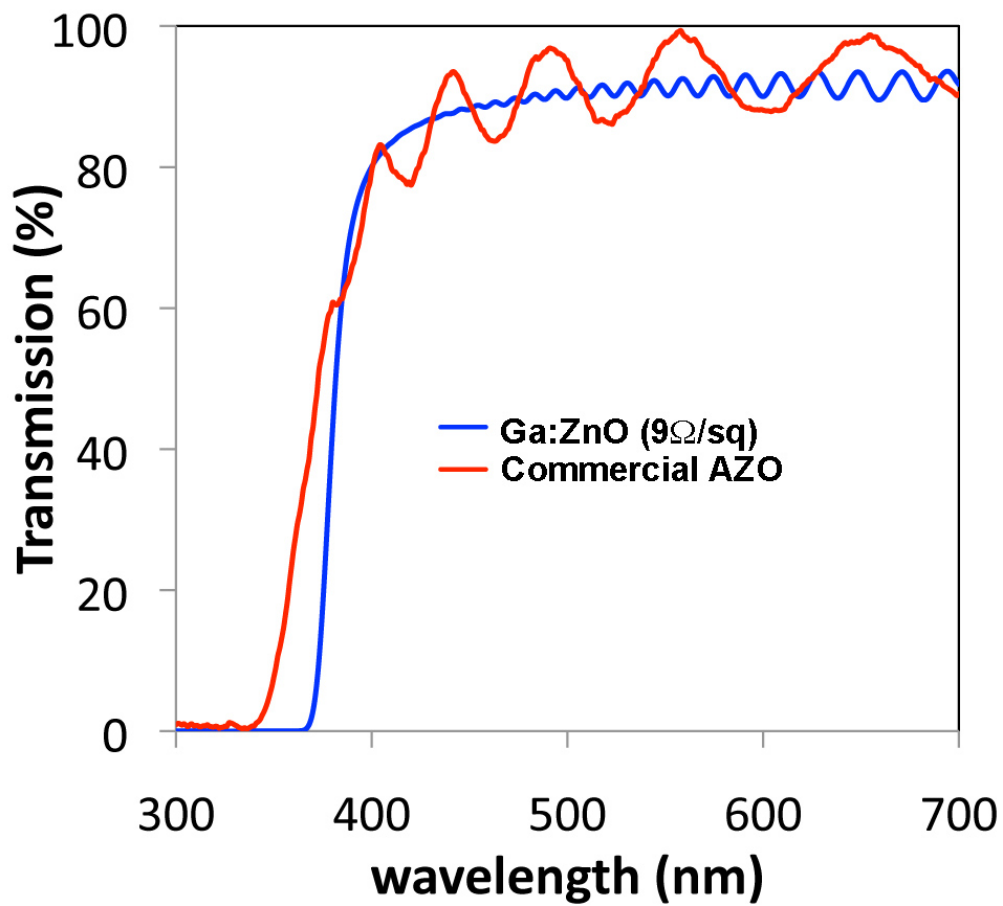

Fig. S3- Transmission spectra of commercial AZO substrate and a 9Ω/sq Ga:ZnO substrate
